# Supplementary material
Source: bioRxiv or medRxiv preprint supplement (https://medrxiv.org/highwire/filestream/91348/field_highwire_adjunct_files/0/2020.07.27.20161810-1.pdf)
Supplement: Supplementary file [file 2020.07.27.20161810-1.pdf]

**Supplemental Table 1: COVID-NET and BRFSS Definitions of Underlying Medical Conditions**

| <b>Underlying medical condition</b>          | <b>COVID-NET<br/>(medical chart abstraction)</b>                                                     | <b>BRFSS (self-report)</b><br>Has a doctor, nurse, or other health professional ever told you that you had any of the following?                             |
|----------------------------------------------|------------------------------------------------------------------------------------------------------|--------------------------------------------------------------------------------------------------------------------------------------------------------------|
| Hypertension                                 | Hypertension                                                                                         | Yes to ever told you have high blood pressure and are currently taking medication for high blood pressure (2017 BRFSS)                                       |
| Coronary Artery Disease                      | History of myocardial infarction, coronary artery disease, coronary artery bypass graphing           | Yes to ever told you had a heart attack also called myocardial infarction? Or Yes to ever told you had angina or coronary heart disease?                     |
| Stroke                                       | Stroke                                                                                               | Yes to ever told you had a stroke                                                                                                                            |
| Diabetes                                     | Diabetes                                                                                             | Yes to ever told you have diabetes?                                                                                                                          |
| Obesity                                      | BMI $\geq$ 30kg/m <sup>2</sup> ; denominator is everyone in sample                                   | Obesity defined as BMI $\geq$ 30kg/m <sup>2</sup> based on self-reported height and weight.                                                                  |
| Severe Obesity                               | BMI $\geq$ 40kg/m <sup>2</sup> ; denominator is everyone in sample                                   | Severe obesity defined as BMI $\geq$ 40kg/m <sup>2</sup> based on self-reported height and weight.                                                           |
| Chronic Kidney Disease                       | Chronic Kidney Disease                                                                               | Yes to ever told kidney disease                                                                                                                              |
| Asthma                                       | Asthma                                                                                               | Yes to do you still have asthma                                                                                                                              |
| Chronic obstructive pulmonary disease (COPD) | COPD                                                                                                 | Yes ever told you have COPD, emphysema, or chronic bronchitis                                                                                                |
| Any condition                                | Presence of any of the above underlying medical condition except for hypertension                    | Presence of any of the above underlying medical condition except for hypertension (because hypertension not available in 2018 BRFSS data)                    |
| Number of conditions                         | Sum of any of the above underlying medical condition except for hypertension; categorized (0,1,2,3+) | Sum of any of the above underlying medical condition except for hypertension (because hypertension not available in 2018 BRFSS data); categorized (0,1,2,3+) |



|        |                      |                    |                    |                      |                      |                     |                     |                     |                    |
|--------|----------------------|--------------------|--------------------|----------------------|----------------------|---------------------|---------------------|---------------------|--------------------|
| No     | 2098/4760<br>(44.1%) | 334/4759<br>(7.0%) | 152/4759<br>(3.2%) | 1424/4759<br>(29.9%) | 2368/4273<br>(55.4%) | 690/4273<br>(16.2%) |                     | 629/4759<br>(13.2%) | 250/4759<br>(5.3%) |
| Yes    | 553/639 (86.5%)      | 170/636<br>(26.7%) | 74/636<br>(11.6%)  | 365/637 (57.3%)      | 298/611<br>(48.8%)   | 78/611<br>(12.8%)   |                     | 68/636<br>(10.7%)   | 76/636<br>(12.0%)  |
| Asthma |                      |                    |                    |                      |                      |                     |                     |                     |                    |
| No     | 2259/4700<br>(48.1%) | 440/4702<br>(9.4%) | 192/4702<br>(4.1%) | 1535/4699<br>(32.7%) | 2223/4230<br>(52.6%) | 593/4230<br>(14.0%) | 568/4698<br>(12.1%) |                     | 253/4702<br>(5.4%) |
| Yes    | 393/700 (56.1%)      | 65/702 (9.3%)      | 34/702<br>(4.8%)   | 254/698 (36.4%)      | 446/658<br>(67.8%)   | 174/658<br>(26.4%)  | 68/697 (9.8%)       |                     | 75/702<br>(10.7%)  |
| COPD   |                      |                    |                    |                      |                      |                     |                     |                     |                    |
| No     | 2408/5073<br>(47.5%) | 412/5076<br>(8.1%) | 194/5076<br>(3.8%) | 1660/5071<br>(32.7%) | 2518/4575<br>(55.0%) | 738/4575<br>(16.1%) | 560/5069<br>(11.1%) | 627/5076<br>(12.4%) |                    |
| Yes    | 244/327 (74.6%)      | 93/328 (28.4%)     | 32/328<br>(9.8%)   | 129/326 (39.6%)      | 151/313<br>(48.2%)   | 29/313<br>(9.3%)    | 76/326 (23.3%)      | 75/328<br>(22.9%)   |                    |

COPD: Chronic obstructive pulmonary disease; COVID-NET: Coronavirus Disease 2019-Associated Hospitalization Surveillance Network

**Supplemental Table 3. Unadjusted and Adjusted\* Rate Ratios for Number of Underlying Medical Conditions and Hospitalization for COVID-19, COVID-NET, March 1-June 23, 2020**

|                       | <b>Unadjusted Rate Ratio (95% CI)</b> | <b>Adjusted Rate Ratio* (95% CI)</b> |
|-----------------------|---------------------------------------|--------------------------------------|
| Number of conditions† |                                       |                                      |
| 1                     | 2.8 (2.7, 3.1)                        | 2.5 (2.1, 3.0)                       |
| 2                     | 5.6 (5.2, 6.1)                        | 4.5 (3.7, 5.5)                       |
| 3+                    | 7.2 (6.6, 7.9)                        | 5.0 (3.9, 6.3)                       |
| Age 45-64 years‡      | -----                                 | 1.8 (1.5, 2.2)                       |
| Age 65+ years‡        | -----                                 | 2.6 (2.1, 3.1)                       |
| Male§                 | -----                                 | 1.2 (1.1, 1.4)                       |
| Non-Hispanic black    | -----                                 | 3.9 (3.3, 4.7)                       |
| Other race/ethnicity  | -----                                 | 3.3 (2.8, 3.9)                       |

CI: Confidence Interval; COVID-NET: Coronavirus Disease 2019-Associated Hospitalization Surveillance Network

\*Model for number of conditions (variable) is adjusted for age, sex, and race/ethnicity

†Reference group is no underlying medical condition; Number of conditions is a sum of underlying medical conditions excluding hypertension; the most recent year of available BRFSS data for hypertension was 2017.

‡Reference group is 18-44 years

§Reference group is female

||Reference group is non-Hispanic white

**Supplemental Table 4. Comparison of Included versus Excluded Adult Cases for the 12 COVID-NET Sites**

| <b>Characteristic</b>                                       | <b>Total, N= 20,046</b> | <b>Included Cases, N=5416</b> | <b>Excluded Cases*, N=14,630</b> |
|-------------------------------------------------------------|-------------------------|-------------------------------|----------------------------------|
| <b>Median age</b>                                           | 62 (IQR: 49-75)         | 55 (IQR: 42-67)               | 65 (IQR: 52-77)                  |
|                                                             | <b>n(%)</b>             | <b>n(%)</b>                   | <b>n(%)</b>                      |
| <b>Sex</b>                                                  |                         |                               |                                  |
| Male                                                        | 10405 (52%)             | 2847 (53%)                    | 7558 (52%)                       |
| Female                                                      | 9632 (48%)              | 2569 (47%)                    | 7063 (48%)                       |
| <b>Race and Ethnicity</b>                                   |                         |                               |                                  |
| Non-Hispanic White                                          | 7019 (39%)              | 1758 (34%)                    | 5261 (41%)                       |
| Non-Hispanic Black                                          | 5366 (30%)              | 1663 (32%)                    | 3703 (29%)                       |
| Other                                                       | 5573 (31%)              | 1798 (34%)                    | 3775 (30%)                       |
| <b>Distribution of cases by month of hospital admission</b> |                         |                               |                                  |
| March                                                       | 4193 (21%)              | 1659 (31%)                    | 2534 (17%)                       |
| April                                                       | 8241 (41%)              | 1881 (35%)                    | 6360 (44%)                       |
| May                                                         | 5726 (29%)              | 1518 (28%)                    | 4208 (29%)                       |
| June                                                        | 1886 (9%)               | 358 (7%)                      | 1528 (10%)                       |

\*Excluded due to missing residence before hospitalization and/or underlying medical conditions
